# Supplementary material for: Paradoxical Reduction in HDL-C With Fenofibrate and Thiazolidinedione Therapy in Type 2 Diabetes: The ACCORD Lipid Trial
Source: PubMed Central journal article supplement — Diabetes Care. 2014 Feb 11;37(3):686–93. doi: 10.2337/dc13-0790 (PMC3931389; doi:10.2337/dc13-0790), 2014-02-11

SUPPLEMENTARY DATA

**Supplementary Table 1.** Number (%) of ACCORD Lipid Trial participants who had a 30% Reduction in HDL-C from baseline to either the 24 and 48 month post-randomization visits, by treatment group and TZD use at visit-specific blood draws\*

A) Outcome: Having a 30% Drop in HDL-C from Baseline Visit to Specified Post-Randomization Visit.

| On TZD at Visit-specific Blood Draw? | At 24 Month Post-RZ Visit<br>(N=4852 with HDL-C Value and TZD use data) |                   |                    | At 48 Month Post-RZ Visit<br>(N=3531 with HDL-C value and TZD use data) |                   |                   |
|--------------------------------------|-------------------------------------------------------------------------|-------------------|--------------------|-------------------------------------------------------------------------|-------------------|-------------------|
|                                      | Fenofibrate                                                             | Placebo           | Total              | Fenofibrate                                                             | Placebo           | Total             |
| Yes                                  | 89/1412<br>(6.3%)                                                       | 13/1375<br>(0.9%) | 102/2787<br>(3.7%) | 51/801<br>(6.4%)                                                        | 7/767<br>(0.9%)   | 58/1568<br>(3.7%) |
| No                                   | 16/1033<br>(1.5%)                                                       | 15/1032<br>(1.5%) | 31/2065<br>(1.5%)  | 30/968<br>(3.1%)                                                        | 10/995<br>(1.0%)  | 40/1963<br>(2.0%) |
| Total                                | 105/2445<br>(4.3%)                                                      | 28/2407<br>(1.2%) | 133/4852<br>(2.7%) | 81/1769<br>(4.6%)                                                       | 17/1762<br>(1.0%) | 98/3531<br>(2.8%) |

B) Outcome: Having a 30% Drop in HDL-C from Baseline Visit to Specified Post-Randomization Visit AND an HDL-C < 25 mg/dl (<0.647 mmol/L) at the Post-Randomization Visit.

| On TZD at Visit-specific Blood Draw? | At 24 Month Post-RZ Visit<br>(N=4852 with HDL-C Value and TZD use data) |                   |                   | At 48 Month Post-RZ Visit<br>(N=3531 with HDL-C value and TZD use data) |                  |                   |
|--------------------------------------|-------------------------------------------------------------------------|-------------------|-------------------|-------------------------------------------------------------------------|------------------|-------------------|
|                                      | Fenofibrate                                                             | Placebo           | Total             | Fenofibrate                                                             | Placebo          | Total             |
| Yes                                  | 71/1412<br>(5.0%)                                                       | 4/1375<br>(0.3%)  | 75/2787<br>(2.7%) | 41/801<br>(5.1%)                                                        | 4/767<br>(0.5%)  | 45/1568<br>(2.9%) |
| No                                   | 6/1033<br>(0.6%)                                                        | 6/1032<br>(0.6%)  | 12/2065<br>(0.6%) | 13/968<br>(1.3%)                                                        | 3/995<br>(0.3%)  | 16/1963<br>(0.8%) |
| Total                                | 77/2445<br>(3.1%)                                                       | 10/2407<br>(0.4%) | 87/4852<br>(1.8%) | 54/1769<br>(3.1%)                                                       | 7/1762<br>(0.4%) | 61/3531<br>(1.7%) |

\*Data are presented as number (%). Denominators for percents are the cell-specific numbers of lipid trial participants who had an HDL-C measurement at the specified visit and for whom the concomitant use or nonuse of a TZD was recorded on study forms. Abbreviations: ACCORD, Action to Control Cardiovascular Risk in Diabetes; TZD, thiazolidinedione; RZ, randomization.

SUPPLEMENTARY DATA

**Supplementary Figure 1.** Cumulative percent of participants with an absolute change in HDL-C from baseline to month 24 (A) or month 48 (B) that is equal to or less than the value specified on the X-axis, by lipid treatment group assignment and use of a TZD at time of visit-specific blood draw. Abbreviations: TZD, thiazolidinedione; Mn, Mean HDL-C value in group at visit in mg/dl; N, number of participants in group. To convert HDL-C to millimoles per liter, multiply by 0.02586.

A) From Baseline to the 24 Month Post-Randomization Visit

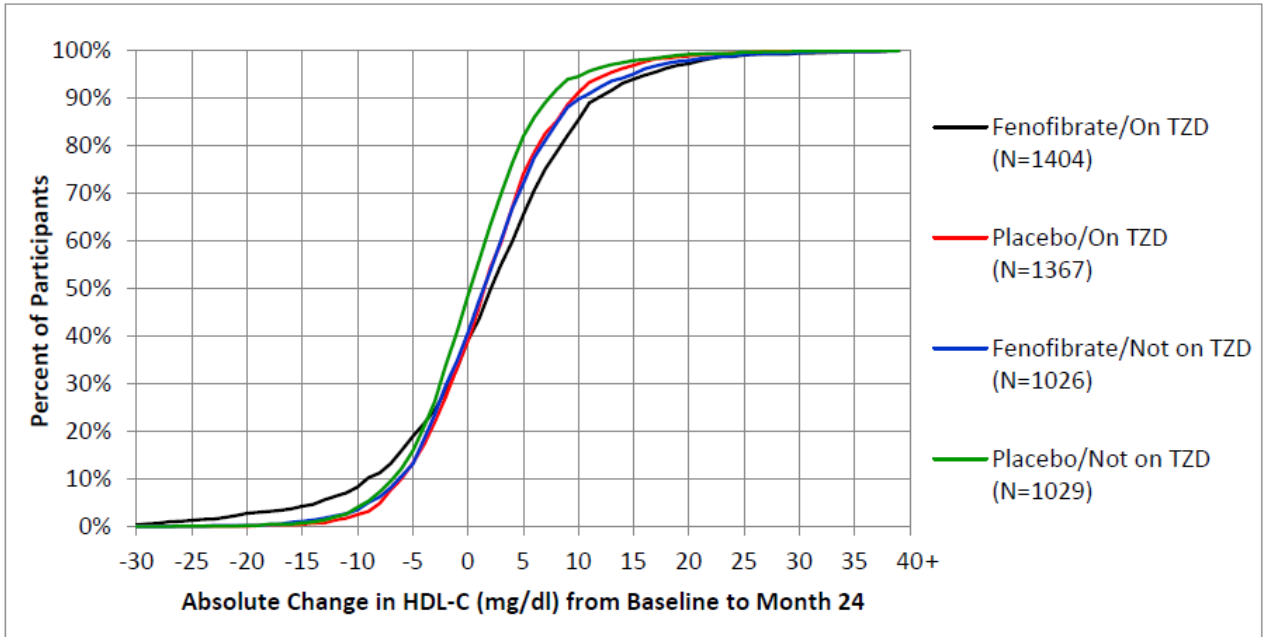

B) From Baseline to the 48 Month Post-Randomization Visit

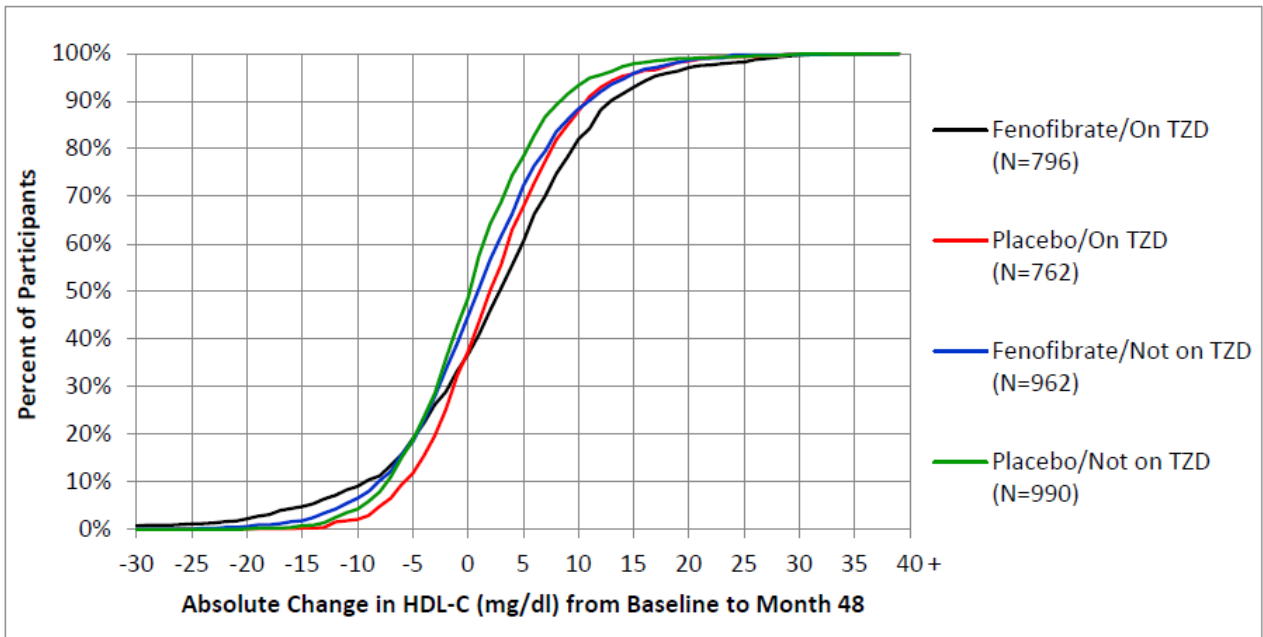

Supplement: supp_dc13-0790v130790_DC130790SupplementaryData.pdf [file supp_dc13-0790v130790_DC130790SupplementaryData.pdf]
